# Supplementary material
Source: HighWire-hosted journal article supplement (http://rc.rcjournal.com/highwire/filestream/22071/field_highwire_adjunct_files/2/rc-09439-File004.docx)
Supplement: rc-09439-File004.docx [file rc-09439-File004.docx]

Title: Variance comparison analysis demonstrating standard deviation of each observed and predicted type of threshold-partitioned equation.

|  |  | **Constant Flow** | | | | | **Decelerating Flow** | | | | | |  | | |
| --- | --- | --- | --- | --- | --- | --- | --- | --- | --- | --- | --- | --- | --- | --- | --- |
| **Threshold-Partitioned Equation** |  | **Standard Deviation from Planimetry Measurement** | **95% Confidence Interval** | | | **Standard Deviation from Planimetry Measurement** | | | **95% Confidence Interval** | | | **p-value comparing standard deviation in constant flow to decelerating flow** | | |
| Total Power | Observed | 0.07 | 0.06 | 0.09 | 0.17 | | | 0.14 | | 0.22 | <0.01 | | |
| Predicted | 0.08 | 0.06 | 0.10 | 0.09 | | | 0.08 | | 0.12 | 0.32 | | |
| Total Power Above Threshold | Observed | 0.11 | 0.09 | 0.14 | 0.17 | | | 0.14 | | 0.22 | 0.02 | | |
| Predicted | 0.10 | 0.08 | 0.13 | 0.14 | | | 0.11 | | 0.17 | 0.79 | | |
| Total Power Increment Above Threshold | Observed | 0.17 | 0.13 | 0.22 | 0.46 | | | 0.38 | | 0.59 | <0.01 | | |
| Predicted | 0.17 | 0.14 | 0.23 | 0.26 | | | 0.22 | | 0.34 | 0.93 | | |
| Total Dynamic Power | Observed | 0.04 | 0.03 | 0.05 | 0.06 | | | 0.05 | | 0.07 | 0.43 | | |
| Predicted | 0.05 | 0.04 | 0.07 | 0.07 | | | 0.06 | | 0.09 | 0.62 | | |
| Dynamic Power Above Threshold | Observed | 0.11 | 0.09 | 0.14 | 0.12 | | | 0.10 | | 0.15 | 0.86 | | |
| Predicted | 0.10 | 0.08 | 0.13 | 0.13 | | | 0.10 | | 0.16 | 0.76 | | |
| Total Driving Power | Observed | 0.07 | 0.06 | 0.09 | 0.10 | | | 0.08 | | 0.12 | 0.16 | | |
| Predicted | 0.11 | 0.09 | 0.14 | 0.11 | | | 0.09 | | 0.14 | 0.80 | | |
| Driving Power Above Threshold | Observed | 0.17 | 0.14 | 0.23 | 0.14 | | | 0.11 | | 0.18 | 0.02 | | |
| Predicted | 0.17 | 0.14 | 0.22 | 0.16 | | | 0.13 | | 0.21 | 0.57 | | |
